# Supplementary material
Source: PubMed Central journal article supplement (PMC4197561)

# Supplemental Figure 1.

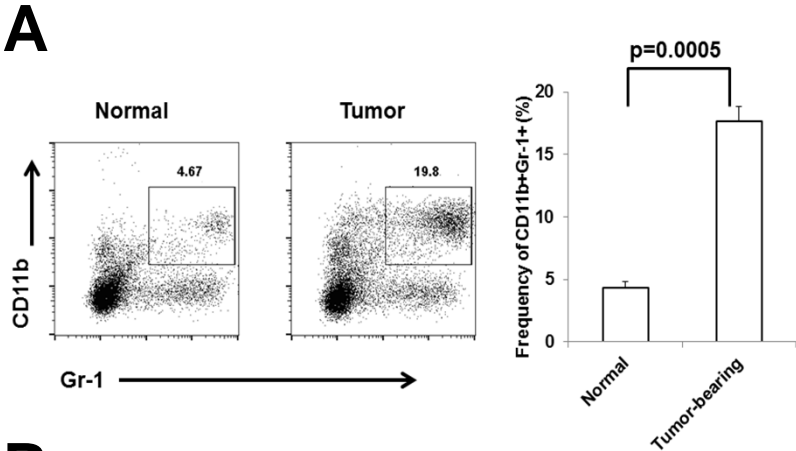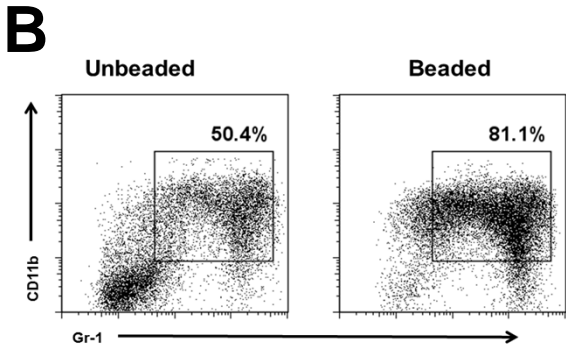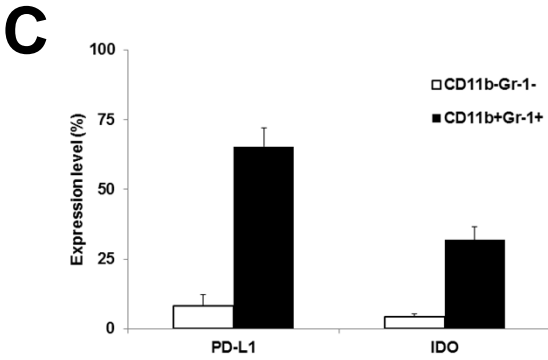

Supplement: supp_jlb.3A0114-012RR_jlb.3AB0114-012RRSuppFigure1.pdf [file supp_jlb.3A0114-012RR_jlb.3AB0114-012RRSuppFigure1.pdf]
